# Supplementary material for: A Systematic Review and Meta-analysis of the Topical Administration of Fibrin Sealant in Total Hip Arthroplasty
Source: PubMed Central journal article supplement (PMC5758515; doi:10.1038/s41598-017-16779-3), 2018-01-08
Supplement: 41598_2017_16779_MOESM1_ESM.pdf [file 41598_2017_16779_MOESM1_ESM.pdf]

# A Systematic Review and Meta-analysis of the Topical Administration of Fibrin Sealant in Total Hip Arthroplasty

Zhihu Zhao<sup>a,b</sup>, Xinlong Ma<sup>a,b</sup>, Jianxiong Ma<sup>c</sup>, Xiaolei Sun<sup>a,b</sup>, Fengbo Li<sup>a,b</sup>, Jianwei Lv<sup>a,b</sup>

a Orthopaedics Institute, Tianjin Hospital, Tianjin, 300050, People's Republic of China.

b Tianjin Hospital, Tianjin University, Tianjin, 300211, People's Republic of China.

c Biomechanics Labs of Orthopaedics Institute, Tianjin Hospital, Tianjin, 300050, People's Republic of China.

Corresponding author: Xinlong Ma, Address: Orthopaedics Institute, Tianjin Hospital, NO.406 Jiefangnan Road, Tianjin, 300000, China. Fax: + 86 13516118843. E-mail: [tianjinbone@163.com](mailto:tianjinbone@163.com).

---

| Search | Query                                                                                             |
|--------|---------------------------------------------------------------------------------------------------|
| #1     | "Fibrin Tissue Adhesive"[Mesh]                                                                    |
| #2     | fibrin glue                                                                                       |
| #3     | fibrin sealant                                                                                    |
| #4     | fibrin adhesive tissue                                                                            |
| #5     | ((arthroplast*[Title/Abstract]) OR replac*[Title/Abstract]) OR prosthe*[Title/Abstract]           |
| #6     | "Hip Joint"[Mesh] OR "Hip"[Mesh]                                                                  |
| #7     | (hip[Title/Abstract]) OR hip joint[Title/Abstract]                                                |
| #8     | "Arthroplasty, Replacement, Hip"[Mesh]                                                            |
| #9     | "Hip"[Mesh] OR "Hip Joint"[Mesh]                                                                  |
| #10    | (hip[Title/Abstract]) OR hip joint[Title/Abstract]                                                |
| #11    | #1 OR #2 OR #3 OR #4                                                                              |
| #12    | #5 OR #6 OR #7 OR #8 OR #9 OR #10                                                                 |
| #13    | "Randomized Controlled Trial" [Publication Type] OR "Randomized Controlled Trials as Topic"[Mesh] |
| #14    | random*                                                                                           |
| #15    | #13 OR #14                                                                                        |
| #16    | #11AND #12 AND #13                                                                                |

---

## PubMed

Searched on: August 2015

**Results:** 78

**Supplementary Table S1:** Search strategies.
